# Supplementary material
Source: MDPI journal article supplement (https://www.mdpi.com/2079-6412/12/6/751)
Supplement: s1 [file s1 › coatings-1693403-supplementary.pdf]

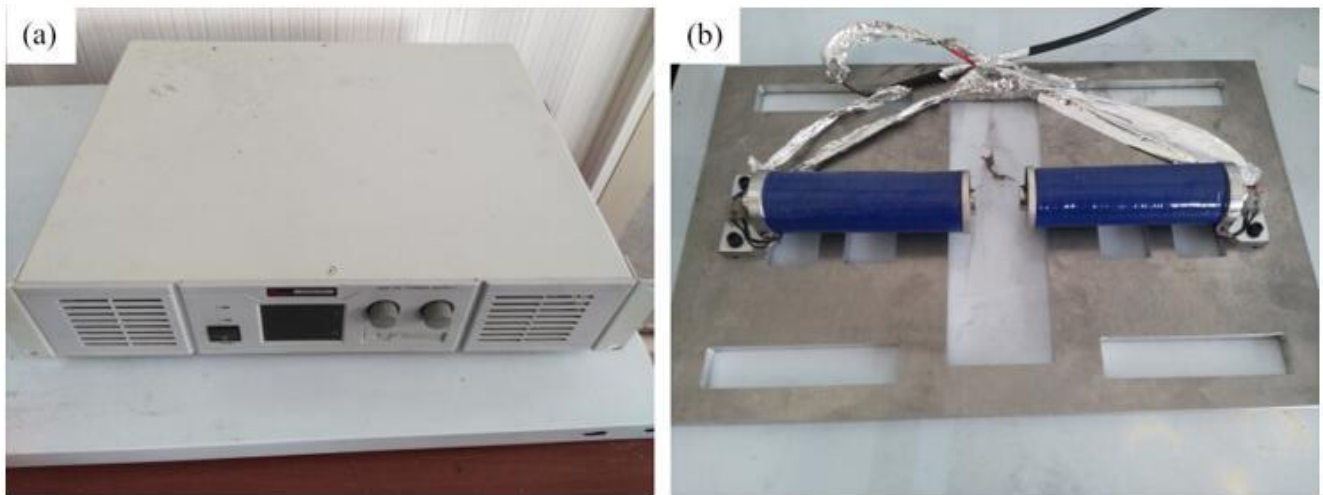

**Figure S1.** Self-made magnetic field generation equipment (a) power (b) exciter.

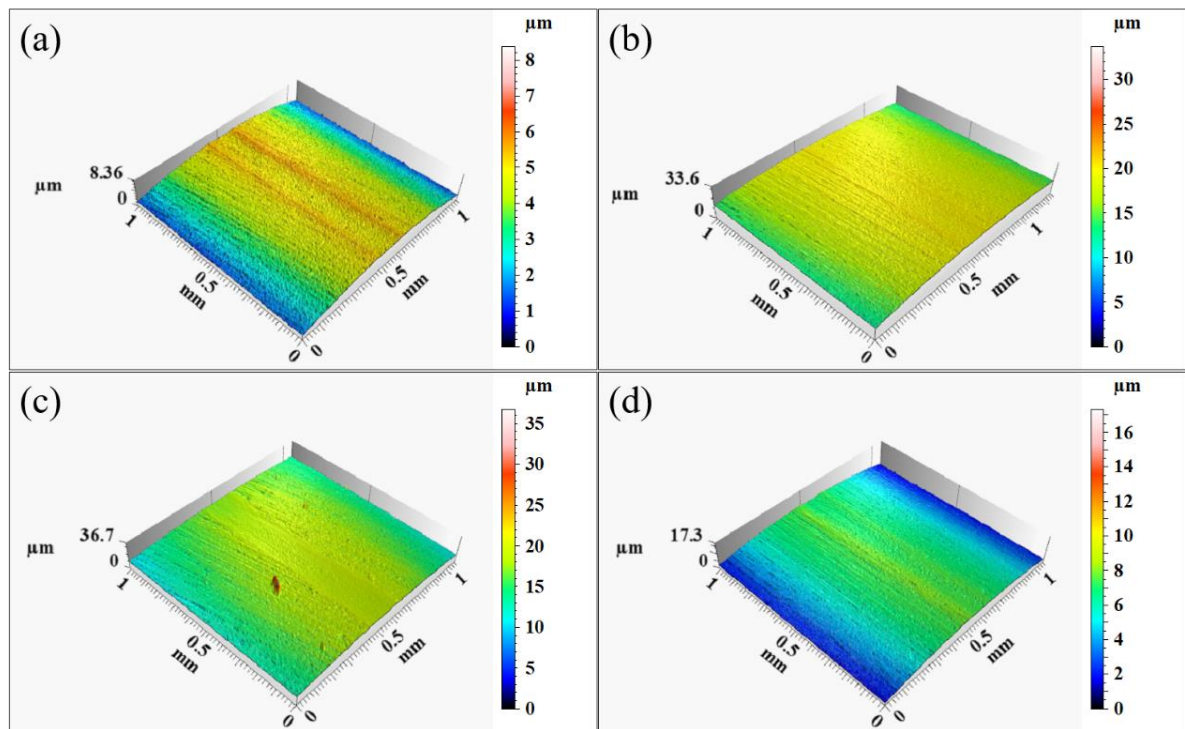

**Figure S2.** 3D morphology of the friction surface with the coating, (a) 1#, (b) 2#, (c) 3#, (d) 4#.

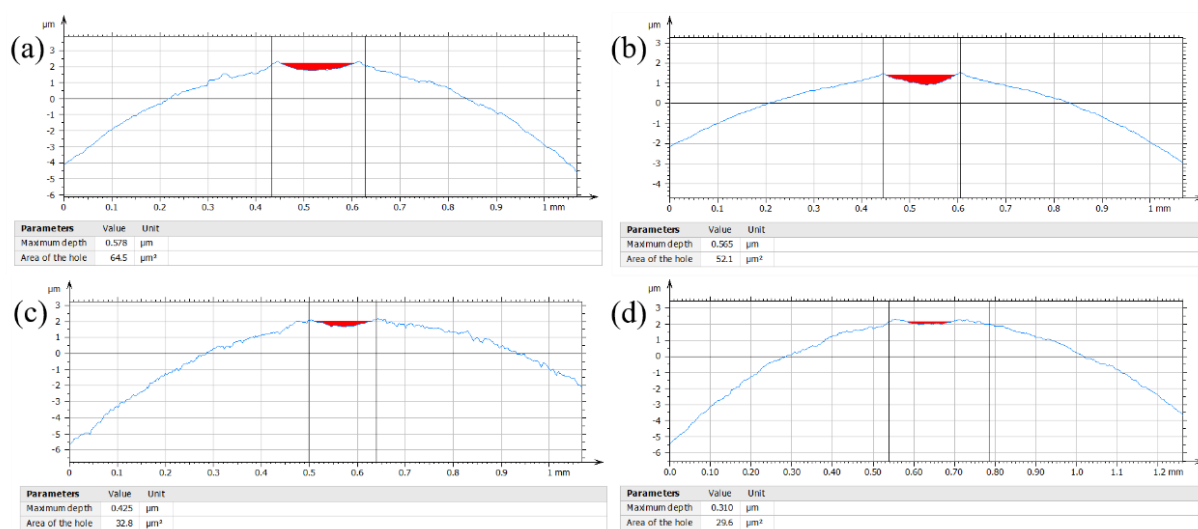

Figure S3. The figure of coating wear section (a) 1#, (b) 2#, (c) 3#, (d) 4#.
